# Supplementary material for: A Boolean Function for Neural Induction Reveals a Critical Role of Direct Intercellular Interactions in Patterning the Ectoderm of the Ascidian Embryo
Source: PubMed Central journal article supplement (PMC4695095; doi:10.1371/journal.pcbi.1004687), 2015-12-29
Supplement: pcbi.1004687.s001.pdf [file pcbi.1004687.s001.pdf]

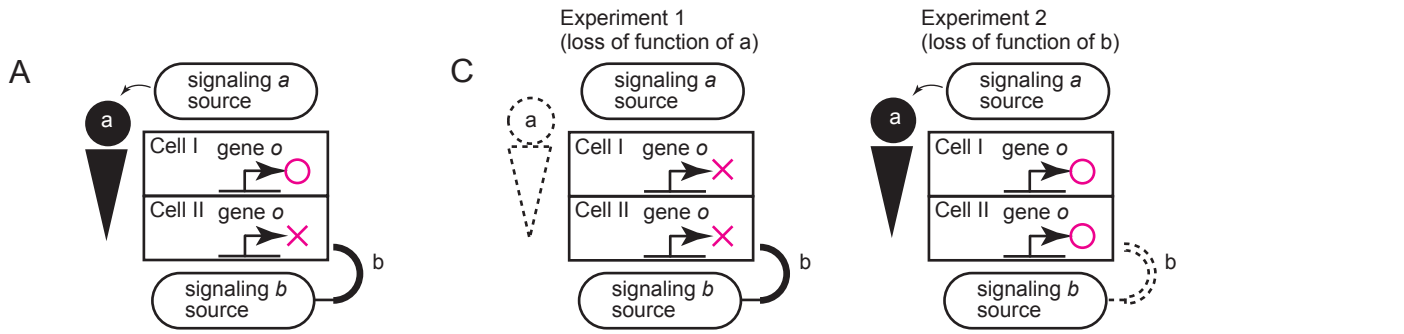

|                                    |         | sensing patterns |        |        |        |        |        |        |        |        |        |        |        |        |        |        |        |        |
|------------------------------------|---------|------------------|--------|--------|--------|--------|--------|--------|--------|--------|--------|--------|--------|--------|--------|--------|--------|--------|
|                                    |         | 1                | 2      | 3      | 4      | 5      | 6      | 7      | 8      | 9      | 10     | 11     | 12     | 13     | 14     | 15     | 16     |        |
| X <sub>o</sub> (gene o expression) | Cell I  | 1 =              | F(0,0) | F(0,0) | F(0,0) | F(0,0) | F(0,1) | F(0,1) | F(0,1) | F(0,1) | F(1,0) | F(1,0) | F(1,0) | F(1,0) | F(1,1) | F(1,1) | F(1,1) | F(1,1) |
|                                    | Cell II | 0 =              | F(0,0) | F(0,1) | F(1,0) | F(1,1) | F(0,0) | F(0,1) | F(1,0) | F(1,1) | F(0,0) | F(0,1) | F(1,0) | F(1,1) | F(0,0) | F(0,1) | F(1,0) | F(1,1) |
| rule 1                             |         |                  |        |        | X      | X      | X      | X      | X      |        |        |        |        | X      |        | X      |        |        |
| rule 2                             |         |                  | X      |        |        |        |        |        | X      |        |        | X      |        |        |        |        | X      |        |
| Exp.1                              | Cell I  | 0 =              | F(0,0) |        |        |        |        |        |        | F(0,0) | F(0,0) |        | F(0,0) |        |        |        |        |        |
|                                    | Cell II | 0 =              | F(0,1) |        |        |        |        |        |        | F(0,0) | F(0,1) |        | F(0,1) |        |        |        |        |        |
| Exp.2                              | Cell I  | 1 =              | F(0,0) |        |        |        |        |        |        | F(1,0) | F(1,0) |        | F(1,0) |        |        |        |        |        |
|                                    | Cell II | 1 =              | F(0,0) |        |        |        |        |        |        | F(0,0) | F(0,0) |        | F(1,0) |        |        |        |        |        |
| compatible Boolean functions       |         |                  |        |        |        |        |        |        |        |        |        |        |        |        |        |        | C      |        |

**D** Boolean function C  
sensing pattern 12

---

F(0,0) = 0 (Cell I, Exp.1)  
 F(0,1) = 0 (Cell II, Exp.1)  
 F(1,0) = 1 (Cell I, normal; Cells I & II, Exp.2)  
 F(1,1) = 0 (Cell II, normal)

---
