# Supplementary material for: A Boolean Function for Neural Induction Reveals a Critical Role of Direct Intercellular Interactions in Patterning the Ectoderm of the Ascidian Embryo
Source: PubMed Central journal article supplement (PMC4695095; doi:10.1371/journal.pcbi.1004687), 2015-12-29
Supplement: pcbi.1004687.s006.pdf [file pcbi.1004687.s006.pdf]

S2 Table. Summary of expression of *Otx* in the animal hemisphere of the 32-cell embryo under normal and experimental conditions.

| Cell | Control | <i>Admp</i> MO | <i>EfnA.d</i> MO | <i>Fg<math>\beta</math>/16/20</i> MO | <i>Gdf1/3-r</i> MO | <i>Admp</i> & <i>Gdf1/3-r</i> MO | <i>Admp</i> & <i>Fg<math>\beta</math>/16/20</i> & <i>Gdf1/3-r</i> MO | <i>Admp</i> RNA | <i>EfnA.d</i> RNA | <i>Gdf1/3-r</i> RNA |
|------|---------|----------------|------------------|--------------------------------------|--------------------|----------------------------------|----------------------------------------------------------------------|-----------------|-------------------|---------------------|
| a6.5 | 1       | 1              | 1                | 0                                    | 1                  | 1                                | 0                                                                    | 1               | 0                 | 1                   |
| a6.6 | 0       | 0              | 1                | 0                                    | 0                  | 1                                | 0                                                                    | 0               | 0                 | 0                   |
| a6.7 | 0       | 0              | 1                | 0                                    | 0                  | 1                                | 0                                                                    | 0               | 0                 | 0                   |
| a6.8 | 0       | 0              | 1                | 0                                    | 0                  | 1                                | 0                                                                    | 0               | 0                 | 0                   |
| b6.5 | 1       | 1              | 1                | 0                                    | 1                  | 1                                | 0                                                                    | 1               | 0                 | 1                   |
| b6.6 | 0       | 0              | 1                | 0                                    | 0                  | 1                                | 0                                                                    | 0               | 0                 | 0                   |
| b6.7 | 0       | 0              | 1                | 0                                    | 0                  | 1                                | 0                                                                    | 0               | 0                 | 0                   |
| b6.8 | 0       | 0              | 1                | 0                                    | 0                  | 1                                | 0                                                                    | 0               | 0                 | 0                   |

Cells expressing *Otx* are indicated by '1', and cells not expressing *Otx* are indicated by '0'. This table is based on data published in our previous study [4].
